# Supplementary material for: NIR light-triggered expansive starch particles for use as artificial thrombi
Source: Royal Society of Chemistry journal article supplement (doi:10.1039/c7tb01094j), 2017-01-01
Supplement: c7tb01094j1.pdf [file c7tb01094j1.pdf]

# NIR Light-Triggered Expansive Starch Particles for Artificial Thrombus

*Shiming Zhang, Shenglong Liao, Yuanyuan Cao, Jian Wang, Ruiting Li, Zhen Wang,  
Yapei Wang\**

Department of Chemistry, Renmin University of China, Beijing 100872, China

\*Email: [yapeiwan@ruc.edu.cn](mailto:yapeiwan@ruc.edu.cn)

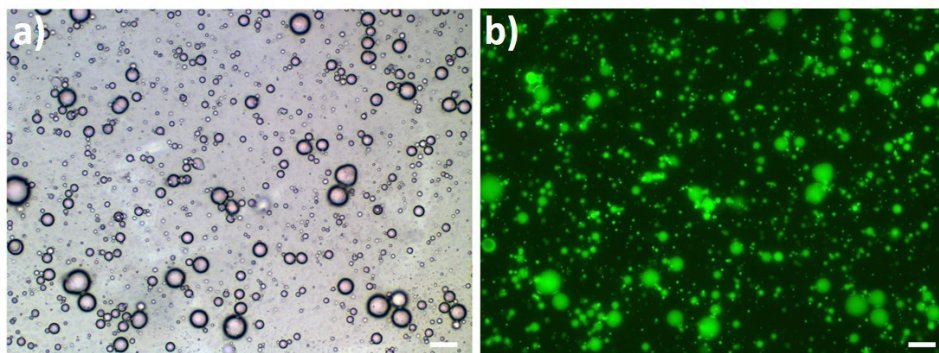

**Figure S1.** a) Optical microscopic image of W/O emulsion in which the disperse phase is starch aqueous solution. b) Fluorescence microscopic image of W/O emulsion in which the water phase is loaded with fluorescein disodium salt. Scale bar is 20  $\mu\text{m}$ .

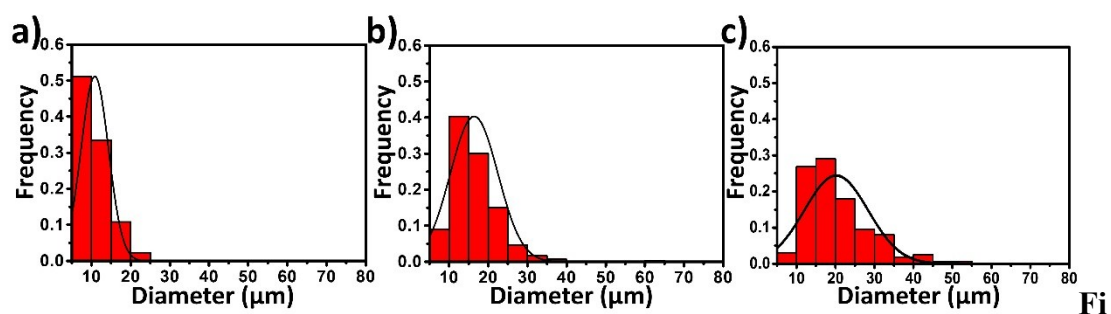

**Figure S2.** a) Size distribution of unmodified starch particles at dry state. b) Size distribution of modified starch particles (5  $\mu\text{L}/\text{mL}$  OTS for 30 min) in hot water (55°C). c) Size distribution of unmodified starch particles in cold water (25°C).

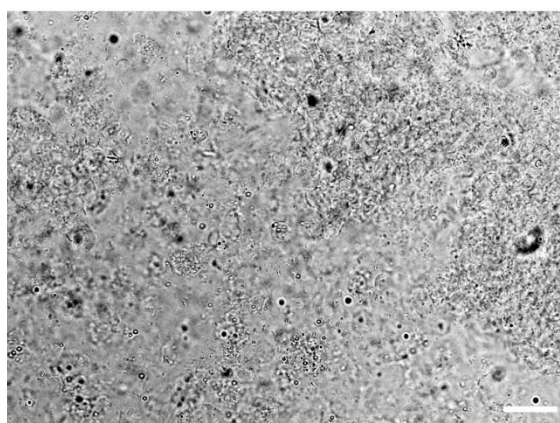

**Figure S3.** Optical microscopic image of totally broken starch particles in aqueous solution under heating at 100°C for 20 min. Scale bar is 20  $\mu\text{m}$ .

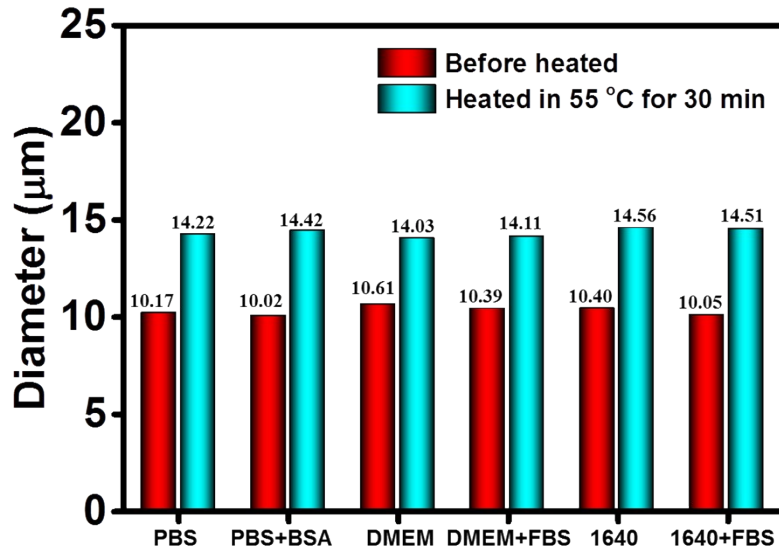

**Figure S4.** Diameter statistics of OTS-modified starch particles in different solution media (PBS, PBS with  $800 \times 10^{-6}$  M BSA, DMEM, DMEM with 10% FBS, 1640 and 1640 with 10% FBS) before heated and heated at 55 °C for 30 min.

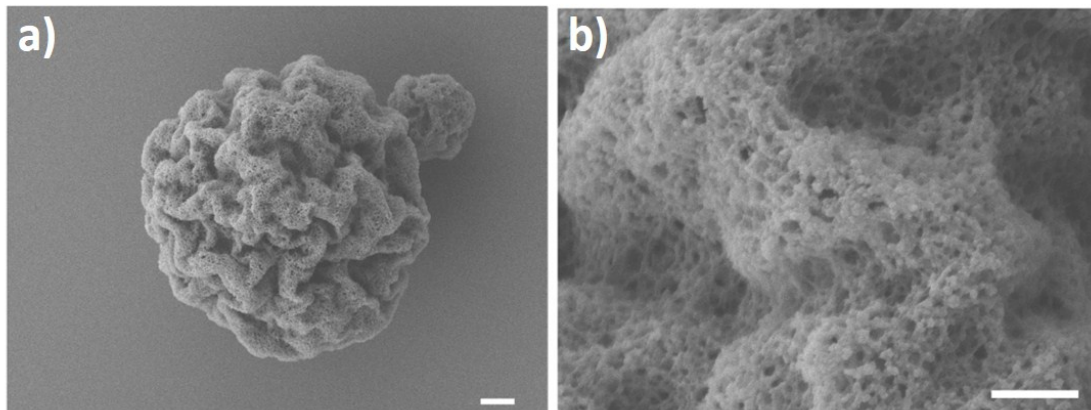

**Figure S5.** SEM images of PPy NPs-loaded starch particles. Scale bar of a) and b) is 1  $\mu\text{m}$  and 500 nm, respectively.

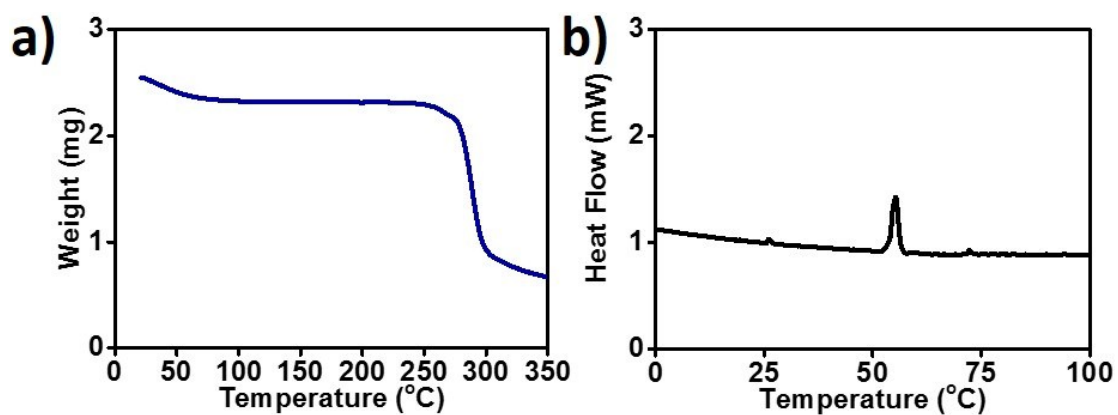

**Figure S6.** a) Thermogravimetric analysis (TGA) of starch particles. b) Differential Scanning Calorimetry analysis of pristine potato starch.

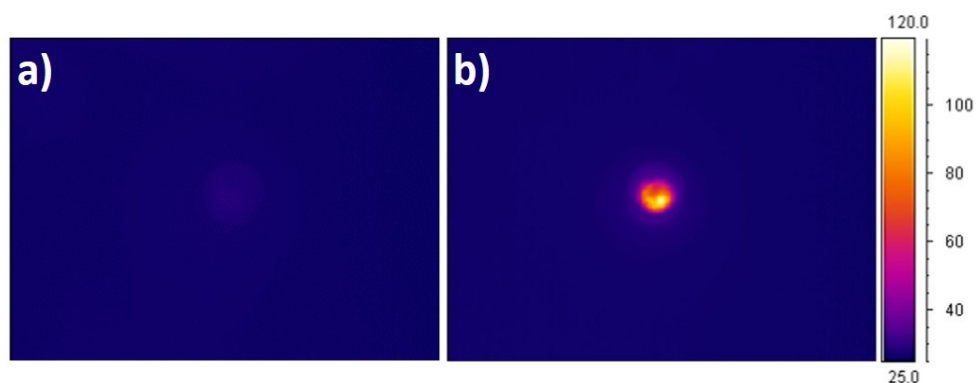

**Figure S7.** a) IR thermal image of pure starch particles upon NIR light illumination for 10 min. b) IR thermal image of starch particles doped with PPy NPs (4.5 wt.%) under NIR light illumination for 10 min. Light power density is 0.50 W/cm<sup>2</sup>.

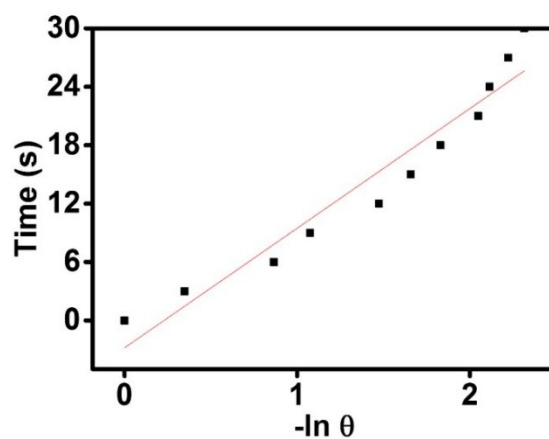

**Figure S8.** Linear fit of the cooling time against  $-\ln\theta$  during a typical cooling period in Fig. 3c.  $\theta$  is defined as the ratio of  $\Delta T$  to  $\Delta T_{\max}$ .

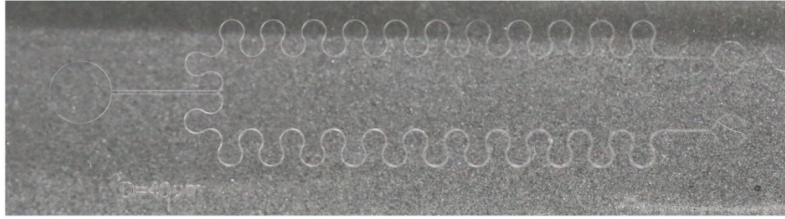

**Figure S9.** The optical image of microchannel which is used as a model of blood vessel.

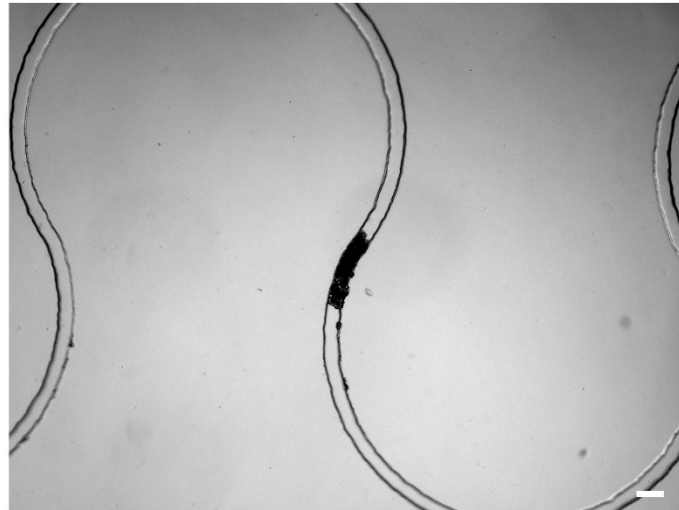

**Figure S10.** Optical image of the microchannel that is successfully blocked by the expanded starch particles.

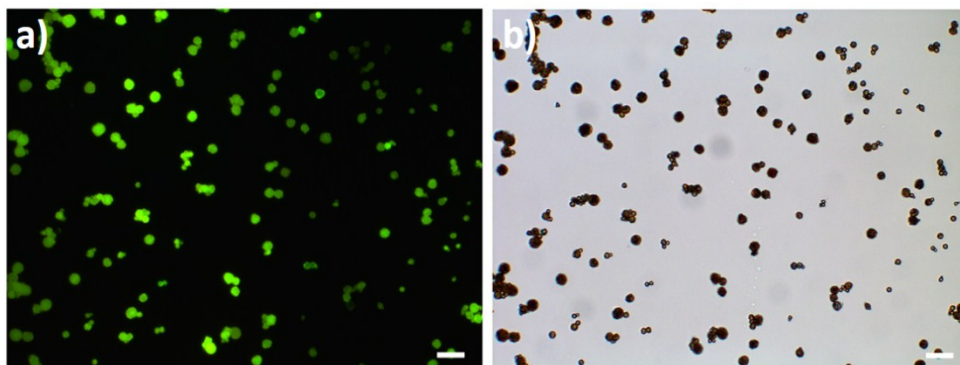

**Figure S11.** Fluorescence a) and bright-field b) microscopic image of OTS modified starch particles loaded with fluorescein disodium salt. Scale bar is 20  $\mu\text{m}$ .

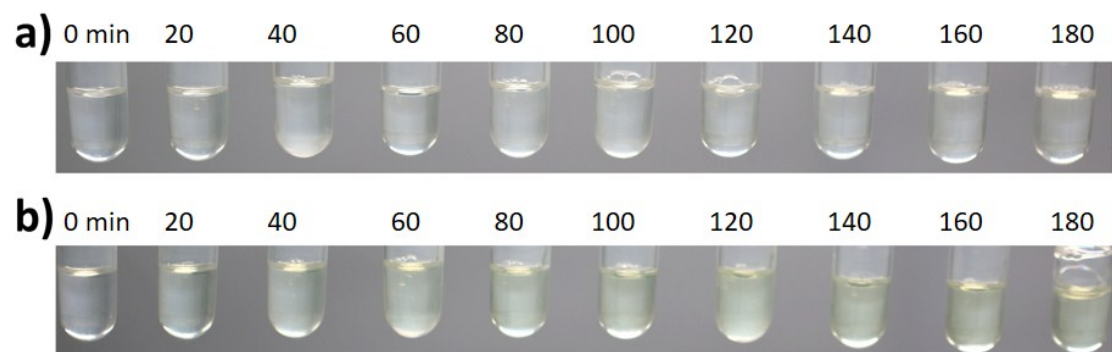

**Figure S12.** Optical images of aqueous solutions consisting of fluorescein disodium salt-loaded starch particles upon the release of fluorescein disodium salt without a) and with b) NIR illumination.
